# Supplementary material for: Examining the Quasi-Static Uniaxial Compressive Behaviour of Commercial High-Performance Epoxy Matrices
Source: MDPI journal article supplement (doi:10.3390/polym15194022), 2023-10-08
Supplement: s1 [file s1]

# Examining the Quasi-Static Uniaxial Compressive Behaviour of Commercial High-Performance Epoxy Matrices

J. F. Gargiuli <sup>1</sup>, G. Quino <sup>1,2</sup>, R. Board <sup>1</sup>, J. C. Griffith <sup>1</sup>, M. S. P. Shaffer <sup>3</sup>, R. S. Trask <sup>1</sup>  
and I. Hamerton <sup>1,\*</sup>

## Supplementary information

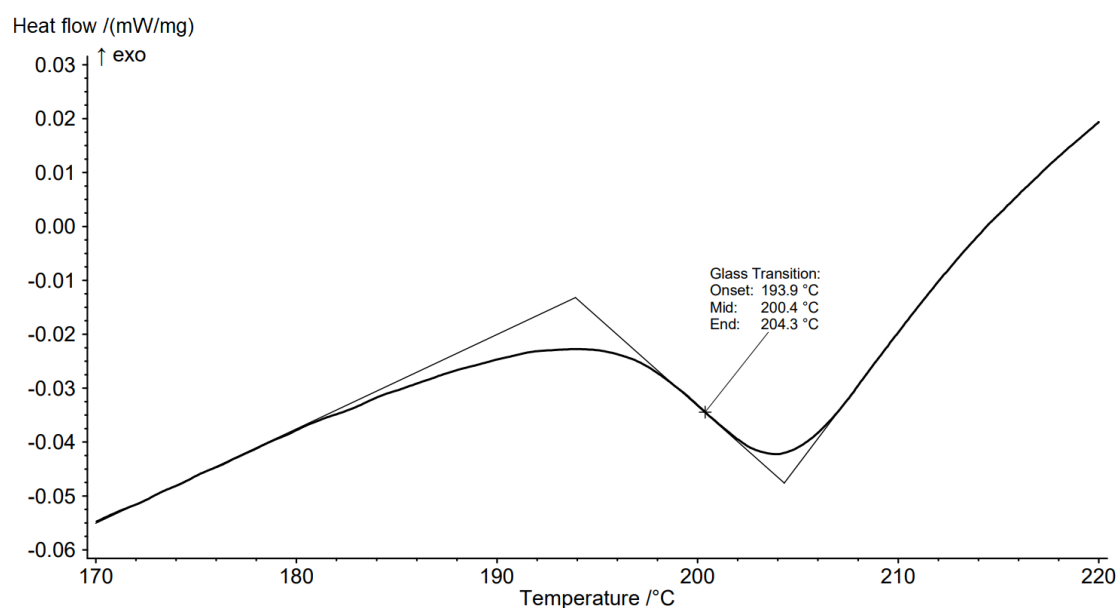

**Figure S1.** Differential scanning calorimetry data plotted as heat flow (exothermic flow upwards) versus temperature for the baseline epoxy resin CYCOM®890 (A)

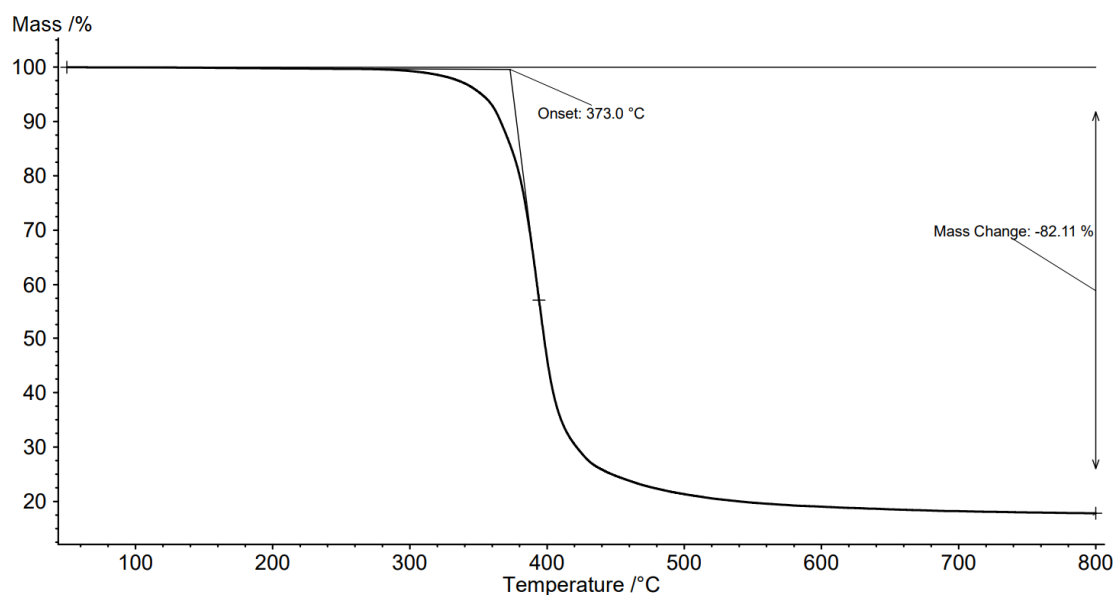

**Figure S2.** Thermogravimetric analysis data plotted as residual mass (%) versus temperature for the cured baseline epoxy resin CYCOM®890 (A)

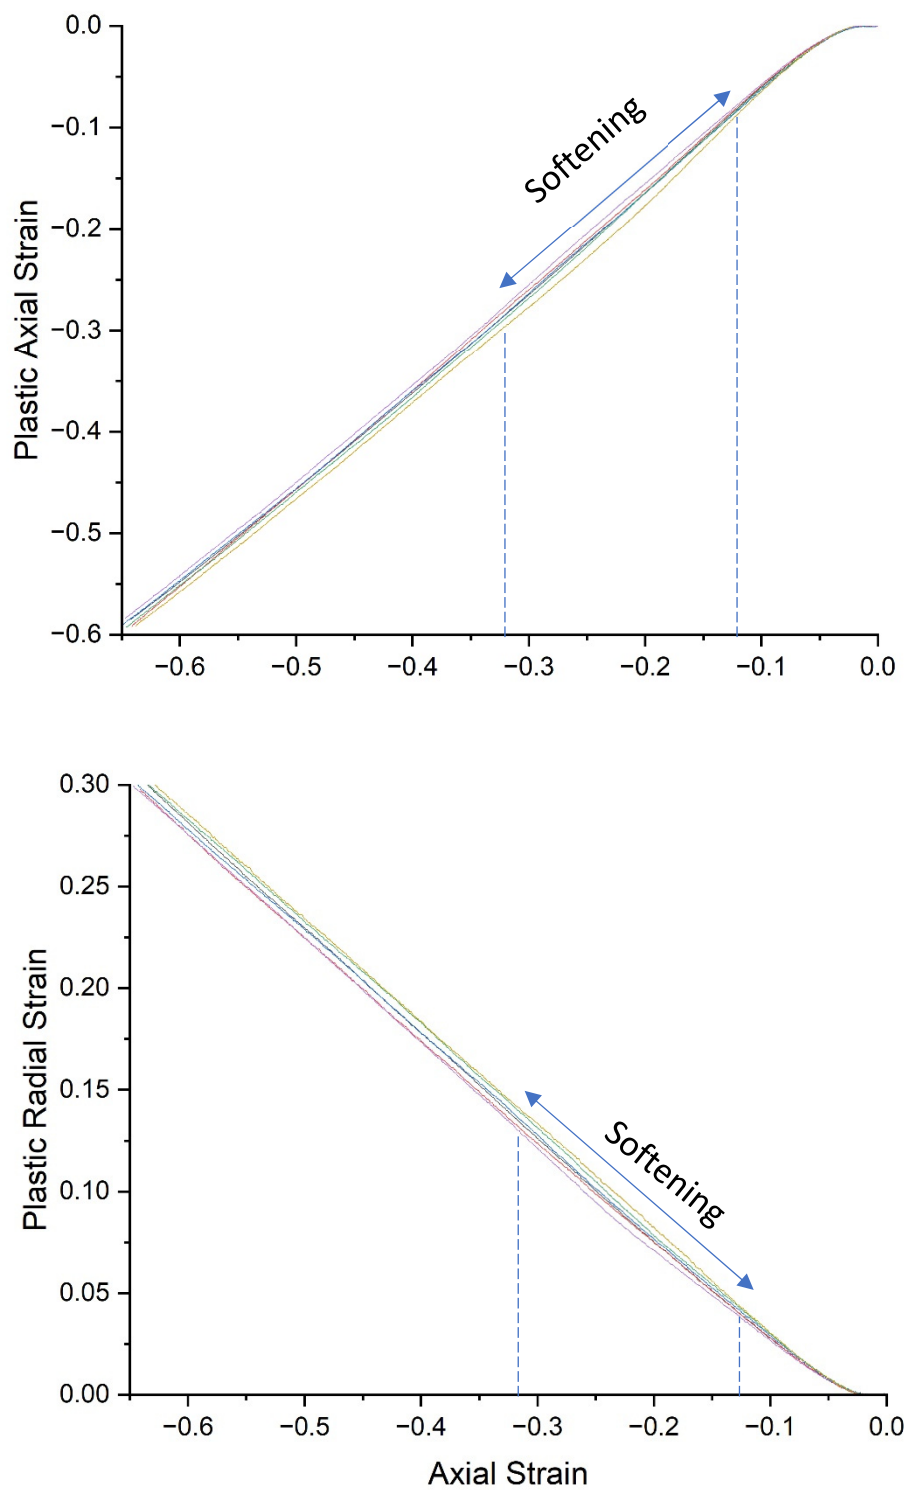

**Figure S3.** Plastic axial strain vs. axial strain (top) and plastic radial strain vs. axial strain (bottom) for CYCOM®890, showing softening region.

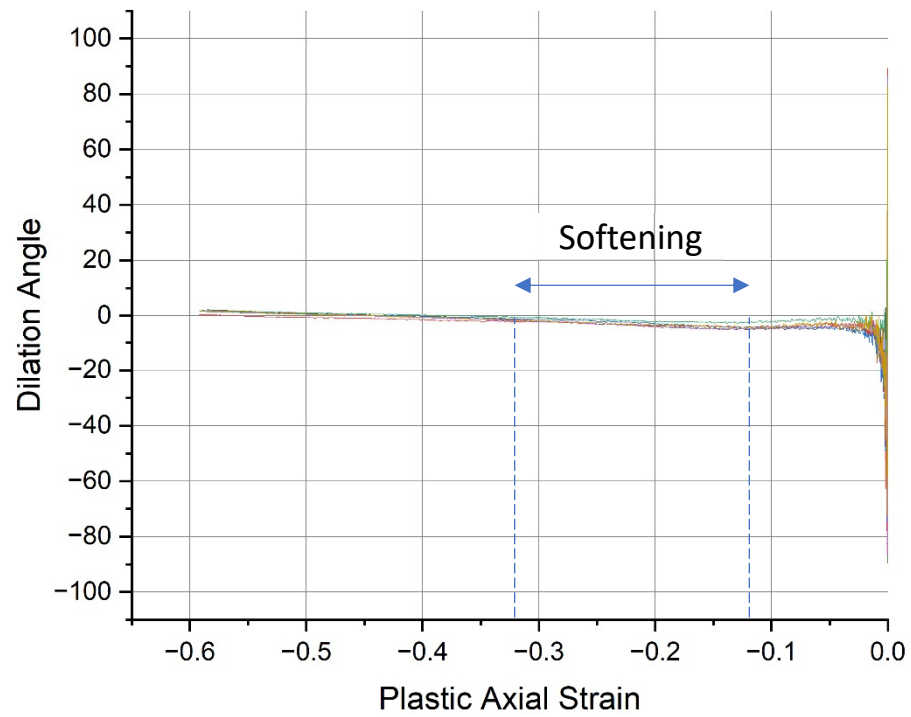

**Figure S4.** Dilation angle vs. plastic axial strain for CYCOM®890, showing softening region.
